# Supplementary material for: Maternal food restrictions during breastfeeding
Source: PubMed Central journal article supplement — Korean J Pediatr. 2017 Mar 27;60(3):70–6. doi: 10.3345/kjp.2017.60.3.70 (PMC5383635; doi:10.3345/kjp.2017.60.3.70), 2017-03-27
Supplement: kjped-60-70-s001.pdf [file kjped-60-70-s001.pdf]

## Supplement material 1. Survey questionnaire

## 〈수유모의 식이 제한 행태에 대한 조사〉

모유 수유를 하시는 어머니들의 의견을 여쭙어 보고, 이를 바탕으로 어머니들에 대한 올바른 안내를 해드리고자 설문조사를 실시합니다. 바쁘시더라도 귀중한 답변을 해 주시기를 부탁드립니다.

제일병원 소아청소년과

1. 모유 수유를 하기 때문에 안 드시는 음식이 있으면 모두 표시해 주십시오. 안 드시는 특별한 이유가 있으시면 적어주십시오.

|    | 식품 종류                               | 안 드시면 V 표시 해주세요 | 드시지 않는 특별한 이유가 있으면 적어 주십시오 |
|----|-------------------------------------|-----------------|----------------------------|
| 1  | 카페인인 든 식품                           |                 |                            |
| 2  | 매운 음식(예: 김치처럼 마늘, 고추, 생강 등이 들어간 식품) |                 |                            |
| 3  | 우유, 유제품                             |                 |                            |
| 4  | 밀가루                                 |                 |                            |
| 5  | 기름진 식품                              |                 |                            |
| 6  | 찬 음식(예: 찬 물, 빙수 등)                  |                 |                            |
| 7  | 콩 제품(예: 두유, 두부 등)                   |                 |                            |
| 8  | 견과류                                 |                 |                            |
| 9  | 생선, 해산물(예: 참치, 고등어, 새우, 게 등)        |                 |                            |
| 10 | 날 음식(예: 생선회, 육회 등)                  |                 |                            |
| 11 | 식혜                                  |                 |                            |
| 12 | 호박                                  |                 |                            |
| 13 | 특정 과일(예: 복숭아, 참외 등)                 |                 |                            |
| 14 | 특정 야채(예: 순무, 양배추 등)                 |                 |                            |
| 15 | 기타 식품                               |                 |                            |

2. 모유 수유 때문에 음식이나 기호품을 제한하시는데 대해 어떻게 느끼십니까?

- ① 많이 힘들다    ② 조금 힘들다    ③ 그저 그렇다    ④ 전혀 힘들지 않다

3. (어머니가 생각하시기에) 모유 분비에 도움이 된다고 생각하는 것을 모두 표시해주십시오.

- ① 따뜻한 음식을 많이 먹는다  
 ② 물을 많이 마신다  
 ③ 미역국을 많이 먹는다  
 ④ 미역국 외 다른 국을 많이 먹는다  
 ⑤ 보양식을 먹는다  
 ⑥ 영양제를 보충한다(예: 비타민, 철분제 등)  
 ⑦ 한약을 먹는다  
 ⑧ 기타:

4. 모유 분비가 촉진된다고 특별히 권유를 받은 음식이 있으면 모두 표시해 주십시오.

- ① 미역국                      ② 족발                      ③ 잉어, 가물치                      ④ 장어  
 ⑤ 우유, 유제품              ⑥ 두유                      ⑦ 개고기                      ⑧ 녹용  
 ⑨ 한약                      ⑩ 영양제                      ⑪ 기타:

5. 모유 수유 중 조심하거나 권장되는 것들에 대한 정보를 어디서 얻으십니까?

- |       |          |           |         |
|-------|----------|-----------|---------|
| ① 가족  | ② 친구나 지인 | ③ TV, 인터넷 | ④ 육아 서적 |
| ⑤ 의료진 | ⑥ 산후 조리원 | ⑦ 산후 도우미  | ⑧ 기타:   |

6. 어머니의 연령은 어떻게 되십니까?

- ① 20-29세      ② 30-39세      ③ 40세 이상

7. 모유 수유 중인 아기는 몇 번째 아기인가요?

- ① 첫째      ② 둘째      ③ 셋째      ④ 넷째 이상

8. 어머니의 최종 학력은 어떻게 되십니까?

- ① 초등학교 졸업 이하      ② 중졸      ③ 고졸      ④ 대졸 이상

9. 가계의 월 수입은 어느 정도입니까?

- ① 200만원 미만      ② 200-299만원      ③ 300-399만원      ④ 400만원 이상
